# Supplementary material
Source: PubMed Central journal article supplement (PMC2705613)
Supplement: 0904187106_0904187106SI.pdf [file 0904187106_0904187106SI.pdf]

# Supporting Information

Potthoff et al.

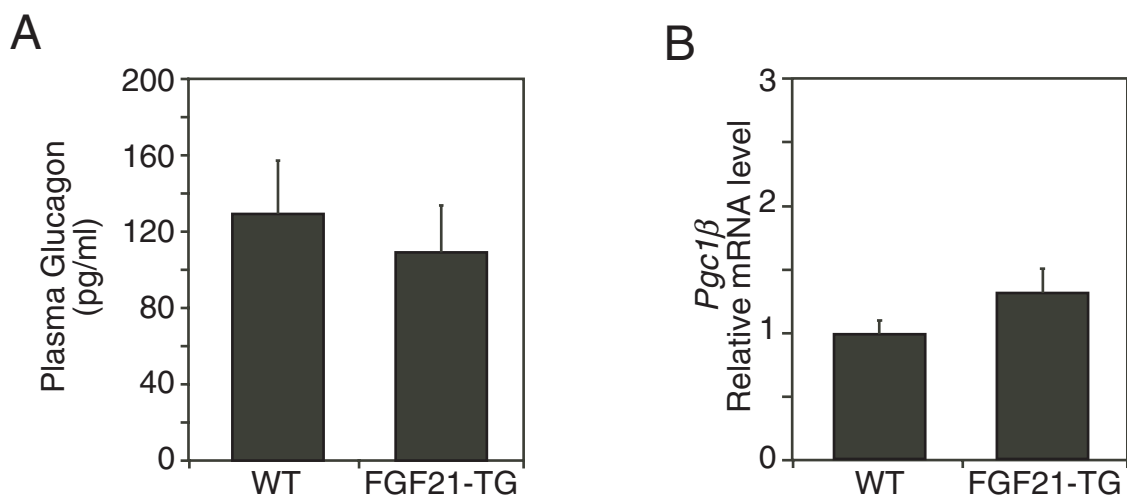

**Fig. S1.** (A) Plasma glucagon concentrations in wild-type (WT) and FGF21-transgenic (FGF21-TG) male mice ( $n = 7-8$  per group). (B) Hepatic *Pgc1β* mRNA levels in fed WT and FGF21-TG male mice ( $n = 5$  per group).

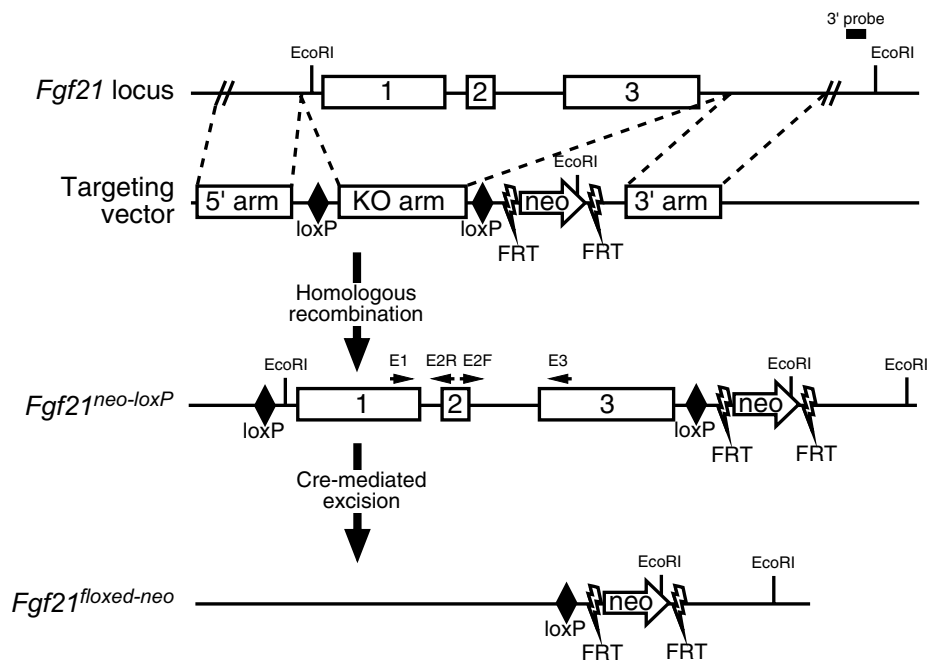

**Fig. S2.** *Fgf21* genomic structure, targeting vector, and targeted allele. *loxP* sites were inserted upstream of exon 1 and downstream of exon 3. Positions of RT-PCR primers for exons 1-3 (E1, E2R, E2F, and E3) are shown as arrows.

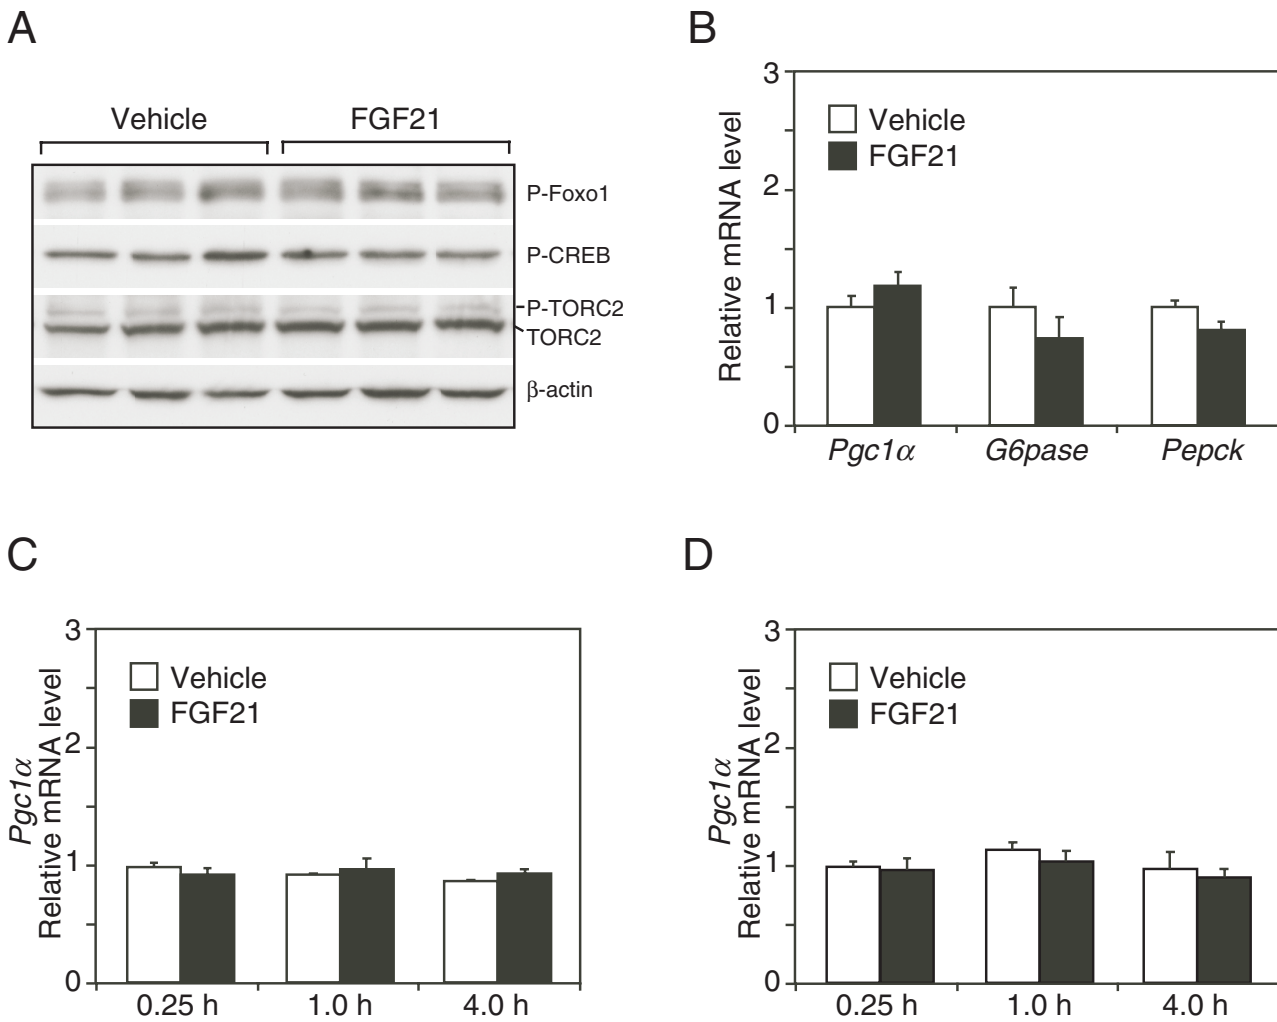

**Fig. S3.** (A) Western blot analysis for phosphorylated Foxo1, phosphorylated CREB, and total and phosphorylated TORC2 in liver lysates prepared from mice 15 min after injection of either vehicle or FGF21 (0.75 μg/g). β-Actin served as a loading control. (B) Gluconeogenic gene expression was analyzed in livers isolated from male mice perfused for 1 hr with media containing vehicle or FGF21 (40 ng/ml) (n = 4 per group). (C and D) *Pgc1α* mRNA levels were analyzed in mouse (C) or rat (D) hepatocytes treated with vehicle or recombinant FGF21 (100 ng/ml) for the indicated times.
